# Supplementary material for: Insights into dissociative electron transfer in esterified shikonin semiquinones by in situ ESR/UV-Vis spectroelectrochemistry
Source: Royal Society of Chemistry journal article supplement (doi:10.1039/c5cp04306a), 2015-01-01
Supplement: c5cp04306a1.pdf [file c5cp04306a1.pdf]

Supporting Information

## Insights into Dissociative Electron Transfer in Esterified Shikonin Semiquinones by in-situ ESR / UV-Vis spectroelectrochemistry

By

Georgina Armendáriz-Vidales and Carlos Frontana\*

\*Subdirección de Investigación, Centro de Investigación y Desarrollo Tecnológico en Electroquímica, S.C., Parque Tecnológico Querétaro SN, Sanfandila, Pedro Escobedo, Querétaro, Mexico. Email: ultrabuho@yahoo.com.mx, cfrontana@cideteq.mx, Tel. +52 (442) 2116000 Ext. 7849, Fax +52 (442) 2116001

Contents:

| Entry                                                                                                                                                                                                                                                                                        | Page |
|----------------------------------------------------------------------------------------------------------------------------------------------------------------------------------------------------------------------------------------------------------------------------------------------|------|
| 1 Internal coordinates as Z-matrices and calculated harmonic frequencies obtained for the minimum energy conformers for the semiquinone structure for shikonin and isovalerylshikonin at the BandHLYP/6-311++G(2d,2p) level considering solvation by the Marenich, Cramer and Truhlar model. | 2    |
| 2 Summary of calculated total energies for obtaining $\Delta G_{\text{cleavage}}$ in equation 4                                                                                                                                                                                              | 11   |
| 3 References                                                                                                                                                                                                                                                                                 | 12   |

**1. Internal coordinates as Z-matrices and calculated harmonic frequencies obtained for the minimum energy conformers for the semiquinone structure for shikonin and isovalerylshikonin at the BandHLYP/6-311++G(2d,2p) level considering solvation by the Marenich, Cramer and Truhlar model**

**Table S1.** Internal coordinates as Z-matrices for shikonin semiquinone

| Atom number | Symbol | NA | Bond      | NB | Angle      | NC | Dihedral    |
|-------------|--------|----|-----------|----|------------|----|-------------|
| 1           | C      |    |           |    |            |    |             |
| 2           | C      | 1  | 1.4176411 |    |            |    |             |
| 3           | C      | 2  | 1.4520041 | 1  | 117.482651 |    |             |
| 4           | C      | 3  | 1.4144305 | 2  | 119.967898 | 1  | -0.0540349  |
| 5           | C      | 4  | 1.4524636 | 3  | 120.52818  | 2  | -0.0129488  |
| 6           | C      | 1  | 1.3694245 | 2  | 123.237834 | 3  | 0.0574528   |
| 7           | H      | 1  | 1.0767193 | 6  | 119.956696 | 5  | 179.850195  |
| 8           | C      | 3  | 1.4066512 | 2  | 120.373866 | 1  | -179.973476 |
| 9           | C      | 4  | 1.4081416 | 3  | 119.286797 | 2  | -179.983535 |
| 10          | C      | 9  | 1.3806791 | 4  | 119.827106 | 3  | 0.1262444   |
| 11          | C      | 8  | 1.3807284 | 3  | 119.788034 | 2  | 179.89796   |
| 12          | H      | 10 | 1.0768706 | 9  | 118.887702 | 4  | 179.855186  |
| 13          | H      | 11 | 1.0768158 | 8  | 119.046    | 3  | -179.895928 |
| 14          | C      | 6  | 1.5103536 | 1  | 121.582084 | 2  | 179.018063  |
| 15          | H      | 14 | 1.0872974 | 6  | 107.976072 | 1  | 142.853911  |
| 16          | C      | 14 | 1.5276951 | 6  | 111.32285  | 1  | -98.3496925 |
| 17          | H      | 16 | 1.0848058 | 14 | 108.261297 | 6  | 64.5967154  |
| 18          | H      | 16 | 1.0878485 | 14 | 106.926699 | 6  | -50.5663728 |
| 19          | C      | 16 | 1.49703   | 14 | 113.046583 | 6  | -170.581043 |
| 20          | H      | 19 | 1.0827609 | 16 | 114.314661 | 14 | 54.3593643  |
| 21          | C      | 19 | 1.330059  | 16 | 128.467375 | 14 | -126.829586 |
| 22          | C      | 21 | 1.5015569 | 19 | 120.87031  | 16 | -178.614508 |
| 23          | H      | 22 | 1.0891504 | 21 | 110.788924 | 19 | -121.526653 |
| 24          | H      | 22 | 1.0851879 | 21 | 111.873374 | 19 | -0.5602025  |
| 25          | H      | 22 | 1.0891711 | 21 | 110.789767 | 19 | 120.38552   |
| 26          | C      | 21 | 1.4998953 | 19 | 124.988975 | 16 | 1.1230867   |
| 27          | H      | 26 | 1.0823714 | 21 | 113.441821 | 19 | 1.6178393   |
| 28          | H      | 26 | 1.0888956 | 21 | 110.23403  | 19 | 122.979688  |
| 29          | H      | 26 | 1.0891764 | 21 | 110.29479  | 19 | -119.708186 |
| 30          | O      | 14 | 1.4161793 | 6  | 112.248365 | 1  | 22.0166203  |
| 31          | H      | 30 | 0.9537122 | 14 | 108.836454 | 6  | 63.7378652  |
| 32          | O      | 9  | 1.3457176 | 4  | 121.131026 | 3  | -179.951092 |
| 33          | H      | 32 | 0.9817713 | 9  | 105.722581 | 4  | -0.1280787  |
| 34          | O      | 8  | 1.3455372 | 3  | 120.99007  | 2  | -0.085006   |
| 35          | H      | 34 | 0.9819549 | 8  | 105.773487 | 3  | 0.0851185   |
| 36          | O      | 5  | 1.2667774 | 4  | 120.64389  | 3  | -179.874175 |
| 37          | O      | 2  | 1.266055  | 1  | 121.686361 | 6  | -179.924235 |

**Table S2.** List of calculated harmonic frequencies of each vibrational normal mode for shikonin semiquinone

| Mode | Frequency / cm <sup>-1</sup> |
|------|------------------------------|
| 1    | 14.75                        |
| 2    | 30.52                        |
| 3    | 39.48                        |
| 4    | 58.45                        |
| 5    | 83.47                        |
| 6    | 101.28                       |
| 7    | 110.66                       |
| 8    | 142.84                       |
| 9    | 157.29                       |
| 10   | 172.60                       |
| 11   | 201.98                       |
| 12   | 205.86                       |
| 13   | 237.97                       |
| 14   | 282.43                       |
| 15   | 304.12                       |
| 16   | 314.76                       |
| 17   | 324.03                       |
| 18   | 344.98                       |
| 19   | 393.99                       |
| 20   | 399.20                       |
| 21   | 407.34                       |
| 22   | 432.03                       |
| 23   | 447.73                       |
| 24   | 450.97                       |
| 25   | 476.83                       |
| 26   | 490.29                       |
| 27   | 494.97                       |
| 28   | 505.09                       |
| 29   | 512.07                       |
| 30   | 554.95                       |
| 31   | 571.06                       |
| 32   | 622.75                       |
| 33   | 665.47                       |
| 34   | 708.99                       |
| 35   | 724.36                       |
| 36   | 741.82                       |
| 37   | 761.07                       |
| 38   | 796.33                       |
| 39   | 814.65                       |

|    |         |
|----|---------|
| 40 | 824.57  |
| 41 | 865.15  |
| 42 | 871.50  |
| 43 | 871.90  |
| 44 | 881.91  |
| 45 | 927.06  |
| 46 | 941.28  |
| 47 | 960.33  |
| 48 | 983.36  |
| 49 | 989.03  |
| 50 | 997.24  |
| 51 | 1034.82 |
| 52 | 1051.81 |
| 53 | 1076.87 |
| 54 | 1084.59 |
| 55 | 1126.64 |
| 56 | 1144.20 |
| 57 | 1164.11 |
| 58 | 1181.89 |
| 59 | 1210.33 |
| 60 | 1220.94 |
| 61 | 1278.90 |
| 62 | 1288.60 |
| 63 | 1293.13 |
| 64 | 1314.91 |
| 65 | 1332.34 |
| 66 | 1339.59 |
| 67 | 1347.32 |
| 68 | 1356.84 |
| 69 | 1400.93 |
| 70 | 1422.45 |
| 71 | 1431.05 |
| 72 | 1447.17 |
| 73 | 1454.58 |
| 74 | 1458.69 |
| 75 | 1464.83 |
| 76 | 1504.11 |
| 77 | 1506.06 |
| 78 | 1512.98 |
| 79 | 1517.33 |
| 80 | 1521.36 |
| 81 | 1522.12 |
| 82 | 1526.74 |

|     |         |
|-----|---------|
| 83  | 1548.13 |
| 84  | 1589.09 |
| 85  | 1604.95 |
| 86  | 1652.15 |
| 87  | 1724.94 |
| 88  | 1732.49 |
| 89  | 1801.21 |
| 90  | 3090.50 |
| 91  | 3097.42 |
| 92  | 3124.00 |
| 93  | 3126.49 |
| 94  | 3135.70 |
| 95  | 3138.15 |
| 96  | 3177.32 |
| 97  | 3181.46 |
| 98  | 3197.72 |
| 99  | 3211.16 |
| 100 | 3268.22 |
| 101 | 3274.84 |
| 102 | 3282.32 |
| 103 | 3330.81 |
| 104 | 3339.08 |
| 105 | 3984.79 |

---

**Table S3.** Internal coordinates as Z-matrices for isovalerylshikonin semiquinone

| Atom Number | Symbol | NA | Bond      | NB | Angle      | NC | Dihedral    |
|-------------|--------|----|-----------|----|------------|----|-------------|
| 1           | C      |    |           |    |            |    |             |
| 2           | C      | 1  | 1.4170897 |    |            |    |             |
| 3           | C      | 2  | 1.4527511 | 1  | 117.460954 |    |             |
| 4           | C      | 3  | 1.4143084 | 2  | 120.020245 | 1  | -0.0617961  |
| 5           | C      | 4  | 1.4528805 | 3  | 120.52821  | 2  | -0.159178   |
| 6           | C      | 1  | 1.3693789 | 2  | 123.074082 | 3  | 0.010958    |
| 7           | H      | 1  | 1.0768886 | 6  | 120.252784 | 5  | 179.853503  |
| 8           | C      | 3  | 1.4061218 | 2  | 120.325858 | 1  | 179.888312  |
| 9           | C      | 4  | 1.4076033 | 3  | 119.321356 | 2  | 179.825228  |
| 10          | C      | 9  | 1.381089  | 4  | 119.795563 | 3  | 0.0702997   |
| 11          | C      | 8  | 1.3810758 | 3  | 119.774833 | 2  | -179.847518 |
| 12          | H      | 10 | 1.0768191 | 9  | 118.884784 | 4  | 179.964833  |
| 13          | H      | 11 | 1.0767607 | 8  | 119.025336 | 3  | -179.989117 |
| 14          | C      | 6  | 1.5054841 | 1  | 121.733704 | 2  | 178.422129  |
| 15          | H      | 14 | 1.0807487 | 6  | 108.964253 | 1  | 147.736512  |
| 16          | C      | 14 | 1.5260584 | 6  | 112.205397 | 1  | -90.5893063 |
| 17          | H      | 16 | 1.0841582 | 14 | 108.648375 | 6  | 63.7919756  |
| 18          | H      | 16 | 1.0881083 | 14 | 106.440611 | 6  | -51.0995031 |
| 19          | C      | 16 | 1.4971491 | 14 | 112.875102 | 6  | -170.850106 |
| 20          | H      | 19 | 1.0824708 | 16 | 114.300455 | 14 | 58.3555845  |
| 21          | C      | 19 | 1.3300383 | 16 | 128.382247 | 14 | -122.16782  |
| 22          | C      | 21 | 1.5011715 | 19 | 120.770448 | 16 | -179.294566 |
| 23          | H      | 22 | 1.0889888 | 21 | 110.705983 | 19 | -121.14207  |
| 24          | H      | 22 | 1.0849895 | 21 | 111.906245 | 19 | -0.1227563  |
| 25          | H      | 22 | 1.0890609 | 21 | 110.775626 | 19 | 120.848757  |
| 26          | C      | 21 | 1.4996564 | 19 | 125.08957  | 16 | 0.5117455   |
| 27          | H      | 26 | 1.0823871 | 21 | 113.492045 | 19 | 2.0134756   |
| 28          | H      | 26 | 1.0887646 | 21 | 110.153351 | 19 | 123.414746  |
| 29          | H      | 26 | 1.0890879 | 21 | 110.224129 | 19 | -119.314668 |
| 30          | O      | 14 | 1.4366633 | 6  | 110.801946 | 1  | 28.409374   |
| 31          | O      | 9  | 1.3455904 | 4  | 121.191555 | 3  | 179.999507  |
| 32          | H      | 31 | 0.9811835 | 9  | 105.794243 | 4  | -0.2260511  |
| 33          | O      | 8  | 1.3453857 | 3  | 121.030989 | 2  | 0.1261379   |
| 34          | H      | 33 | 0.9817309 | 8  | 105.786107 | 3  | -0.0438685  |
| 35          | O      | 5  | 1.2660195 | 4  | 120.757857 | 3  | -179.499678 |
| 36          | O      | 2  | 1.2655725 | 1  | 121.669465 | 6  | 179.996474  |
| 37          | C      | 30 | 1.3292694 | 14 | 118.721869 | 6  | 83.3517846  |
| 38          | C      | 37 | 1.5016778 | 30 | 111.432226 | 14 | -175.898633 |
| 39          | H      | 38 | 1.0861354 | 37 | 108.922684 | 30 | -31.3675591 |
| 40          | H      | 38 | 1.0900691 | 37 | 105.314297 | 30 | 82.483874   |

|    |   |    |           |    |            |    |             |
|----|---|----|-----------|----|------------|----|-------------|
| 41 | C | 38 | 1.5248368 | 37 | 114.53502  | 30 | -156.380398 |
| 42 | H | 41 | 1.0872926 | 38 | 107.7515   | 37 | -49.4115609 |
| 43 | C | 41 | 1.5240725 | 38 | 111.364854 | 37 | 69.2932377  |
| 44 | H | 43 | 1.086486  | 41 | 111.75587  | 38 | -57.5199484 |
| 45 | H | 43 | 1.0886902 | 41 | 110.700987 | 38 | 62.8144456  |
| 46 | H | 43 | 1.0870351 | 41 | 110.837663 | 38 | -177.648079 |
| 47 | C | 41 | 1.5232241 | 38 | 110.056255 | 37 | -167.278582 |
| 48 | H | 47 | 1.0870041 | 41 | 110.874835 | 38 | 179.402814  |
| 49 | H | 47 | 1.0886423 | 41 | 111.081462 | 38 | -60.9182978 |
| 50 | H | 47 | 1.0871477 | 41 | 111.319428 | 38 | 59.2936116  |
| 51 | O | 37 | 1.1995096 | 30 | 123.39503  | 14 | 2.2477938   |

**Table S4.** List of calculated harmonic frequencies for each vibrational normal mode for isovalerylshikonin semiquinone

| Mode | Frequency / cm <sup>-1</sup> |
|------|------------------------------|
| 1    | 18.09                        |
| 2    | 19.61                        |
| 3    | 31.64                        |
| 4    | 34.03                        |
| 5    | 38.35                        |
| 6    | 43.11                        |
| 7    | 54.89                        |
| 8    | 86.60                        |
| 9    | 92.69                        |
| 10   | 111.9                        |
| 11   | 119.66                       |
| 12   | 127.60                       |
| 13   | 143.29                       |
| 14   | 153.39                       |
| 15   | 160.89                       |
| 16   | 194.06                       |
| 17   | 204.71                       |
| 18   | 232.58                       |
| 19   | 234.77                       |
| 20   | 245.97                       |
| 21   | 252.42                       |
| 22   | 275.04                       |
| 23   | 310.58                       |
| 24   | 317.18                       |
| 25   | 338.76                       |
| 26   | 349.13                       |
| 27   | 378.29                       |
| 28   | 392.66                       |

|    |         |
|----|---------|
| 29 | 397.37  |
| 30 | 405.28  |
| 31 | 418.72  |
| 32 | 436.14  |
| 33 | 443.64  |
| 34 | 450.34  |
| 35 | 463.67  |
| 36 | 486.01  |
| 37 | 490.52  |
| 38 | 505.32  |
| 39 | 511.38  |
| 40 | 518.26  |
| 41 | 563.20  |
| 42 | 572.79  |
| 43 | 618.55  |
| 44 | 630.64  |
| 45 | 668.97  |
| 46 | 714.43  |
| 47 | 726.37  |
| 48 | 744.62  |
| 49 | 761.30  |
| 50 | 770.24  |
| 51 | 806.36  |
| 52 | 814.82  |
| 53 | 825.81  |
| 54 | 863.92  |
| 55 | 868.52  |
| 56 | 874.01  |
| 57 | 884.28  |
| 58 | 884.44  |
| 59 | 925.08  |
| 60 | 929.31  |
| 61 | 935.84  |
| 62 | 960.01  |
| 63 | 964.63  |
| 64 | 983.60  |
| 65 | 986.66  |
| 66 | 989.23  |
| 67 | 996.32  |
| 68 | 1006.63 |
| 69 | 1030.90 |
| 70 | 1045.37 |
| 71 | 1053.67 |
| 72 | 1082.29 |
| 73 | 1102.34 |



|     |         |
|-----|---------|
| 74  | 1122.15 |
| 75  | 1143.41 |
| 76  | 1165.56 |
| 77  | 1171.60 |
| 78  | 1182.43 |
| 79  | 1183.87 |
| 80  | 1223.06 |
| 81  | 1233.62 |
| 82  | 1250.50 |
| 83  | 1265.26 |
| 84  | 1284.56 |
| 85  | 1293.46 |
| 86  | 1305.46 |
| 87  | 1311.22 |
| 88  | 1315.44 |
| 89  | 1333.20 |
| 90  | 1343.83 |
| 91  | 1356.91 |
| 92  | 1374.82 |
| 93  | 1403.13 |
| 94  | 1408.38 |
| 95  | 1411.37 |
| 96  | 1430.89 |
| 97  | 1438.34 |
| 98  | 1448.82 |
| 99  | 1450.91 |
| 100 | 1457.97 |
| 101 | 1459.00 |
| 102 | 1464.22 |
| 103 | 1465.40 |
| 104 | 1493.06 |
| 105 | 1504.98 |
| 106 | 1509.82 |
| 107 | 1514.59 |
| 108 | 1517.80 |
| 109 | 1522.2  |
| 110 | 1524.21 |
| 111 | 1525.10 |
| 112 | 1526.39 |
| 113 | 1527.72 |
| 114 | 1535.29 |
| 115 | 1540.37 |
| 116 | 1547.63 |
| 117 | 1589.89 |
| 118 | 1606.17 |

|     |         |
|-----|---------|
| 119 | 1653.35 |
| 120 | 1725.26 |
| 121 | 1733.65 |
| 122 | 1800.86 |
| 123 | 1840.52 |
| 124 | 3092.77 |
| 125 | 3095.63 |
| 126 | 3099.03 |
| 127 | 3099.98 |
| 128 | 3113.18 |
| 129 | 3122.97 |
| 130 | 3123.77 |
| 131 | 3138.44 |
| 132 | 3140.8  |
| 133 | 3157.11 |
| 134 | 3162.59 |
| 135 | 3166.98 |
| 136 | 3170.6  |
| 137 | 3173.22 |
| 138 | 3181.49 |
| 139 | 3183.84 |
| 140 | 3200.5  |
| 141 | 3210.79 |
| 142 | 3217.09 |
| 143 | 3268.27 |
| 144 | 3273.52 |
| 145 | 3282.32 |
| 146 | 3336.53 |
| 147 | 3350.65 |

---

**2. Summary of calculated total energies for obtaining  $\Delta G_{\text{cleavage}}$  in equation 1.**

| Calculated Total Energy | E / eV    |
|-------------------------|-----------|
| R <sup>-</sup>          | -9427.55  |
| Q <sup>•-</sup>         | -34444.77 |
| Q <sup>-</sup>          | -25020.35 |

### 3. References

- 1 Gaussian 09, Revision B.01, Gaussian, Frisch, M. J.; Trucks, G. W.; Schlegel, H. B.; Scuseria, G. E.; Robb, M. A.; Cheeseman, J. R.; Scalmani, G.; Barone, V.; Mennucci, B.; Petersson, G. A.; Nakatsuji, H.; Caricato, M.; Li, X.; Hratchian, H. P.; Izmaylov, A. F.; Bloino, J.; Zheng, G.; Sonnenberg, J. L.; Hada, M.; Ehara, M.; Toyota, K.; Fukuda, R.; Hasegawa, J.; Ishida, M.; Nakajima, T.; Honda, Y.; Kitao, O.; Nakai, H.; Vreven, T.; Montgomery Jr., J. A.; Peralta, J. E.; Ogliaro, F.; Bearpark, M.; Heyd, J. J.; Brothers, E.; Kudin, K. N.; Staroverov, V. N.; Keith, T.; Kobayashi, R.; Normand, J.; Raghavachari, K.; Rendell, A.; Burant, J. C.; Iyengar, S. S.; Tomasi, J.; Cossi, M.; Rega, N.; Millam, J. M.; Klene, M.; Knox, J. E.; Cross, J. B.; Bakken, V.; Adamo, C.; Jaramillo, J.; Gomperts, R.; Stratmann, R. E.; Yazyev, O.; Austin, A. J.; Cammi, R.; Pomelli, C.; Ochterski, J. W.; Martin, R. L.; Morokuma, K.; Zakrzewski, V. G.; Voth, G. A.; Salvador, P.; Dannenberg, J. J.; Dapprich, S.; Daniels, A. D.; Farkas, O.; Foresman, J. B.; Ortiz, J. V.; Cioslowski, J.; Fox, D. J., Inc., Wallingford: CT, 2010.
- 2 A. V. Marenich, C. J. Cramer, D. G. Truhlar, *J. Phys. Chem. B*, 2009, **113**, 6378.
- 3 C. P. Andrieux, A. L. Gorande, J. M. Savéant, *J. Am. Chem. Soc.*, 1992, **114**, 6892-6904.
